# Supplementary material for: Revealing the impact of CO2 exposure during calcination on the physicochemical and electrochemical properties of LiNi0.8Co0.1Mn0.1O2
Source: Royal Society of Chemistry journal article supplement (doi:10.1039/d4nr04146a), 2024-01-01
Supplement: d4nr04146a1.pdf [file d4nr04146a1.pdf]

**aSupplementary Information**

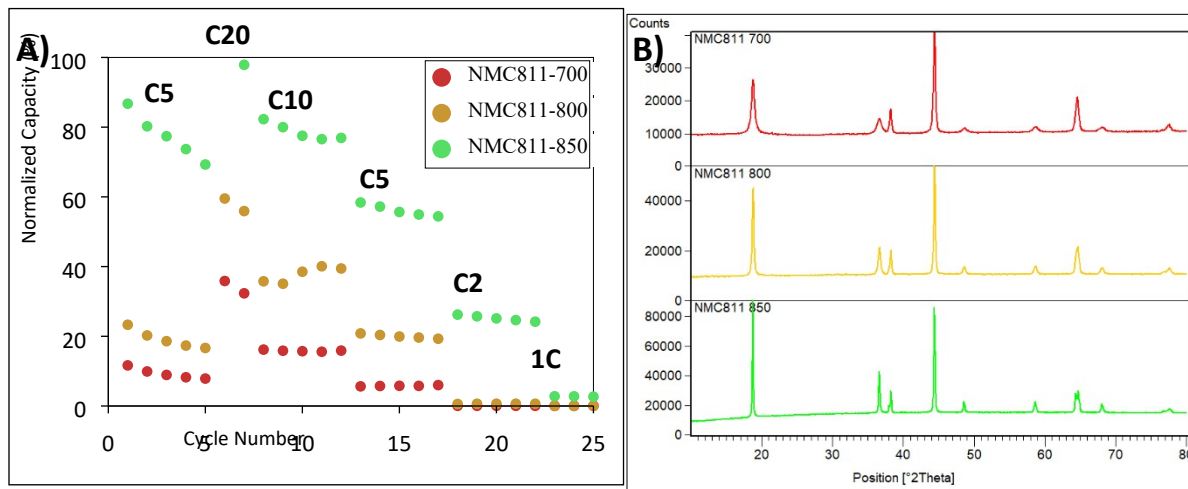

Figure S1. A) C-rate normalized capacity results and B) XRD spectra of NMC811 samples calcined at 700 °C, 800 °C, and 850 °C in air for 6h.

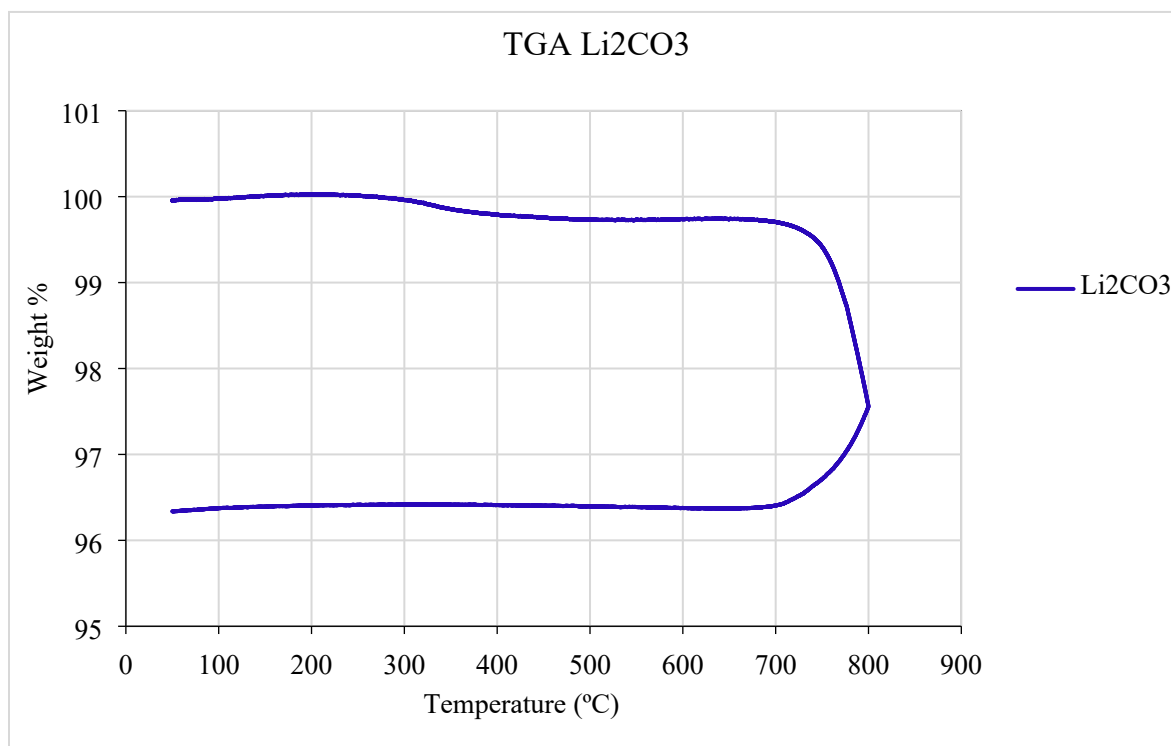

Figure S2.  $\text{Li}_2\text{CO}_3$  TGA results.

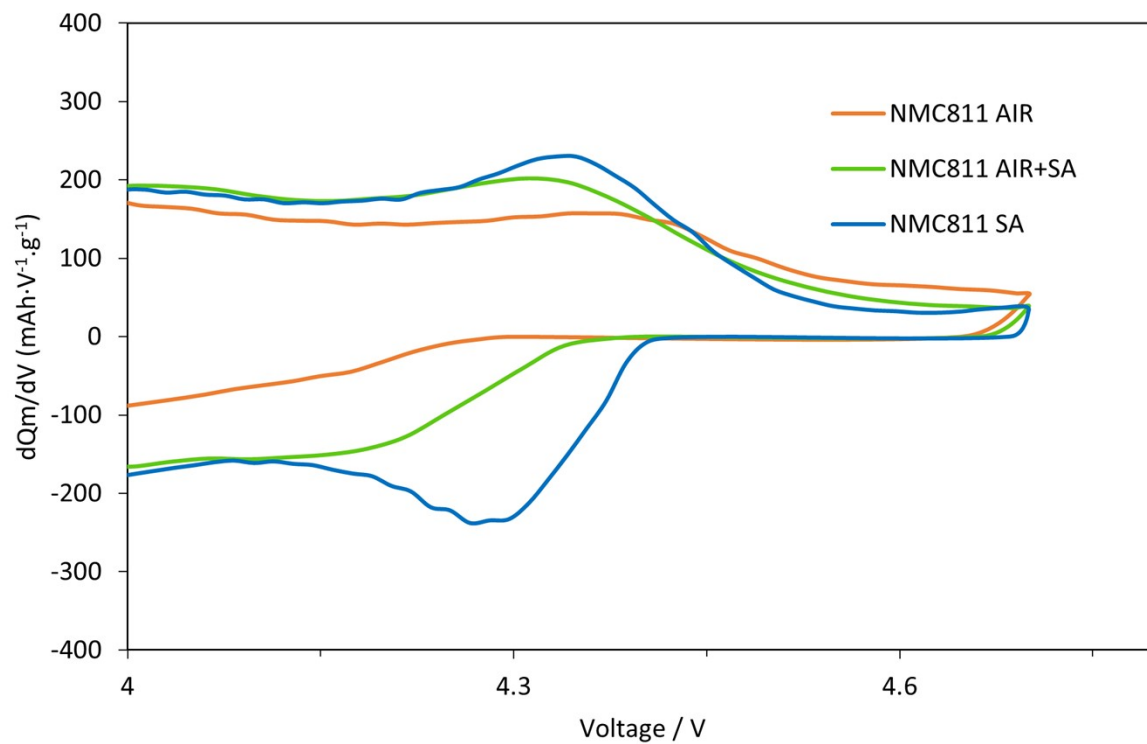

Figure S3.  $dQ_m/dV$  of the NMC811 AIR, AIR+SA, and SA samples of the formation cycle at C/20. The cut-off voltage was increased to 4.7V.

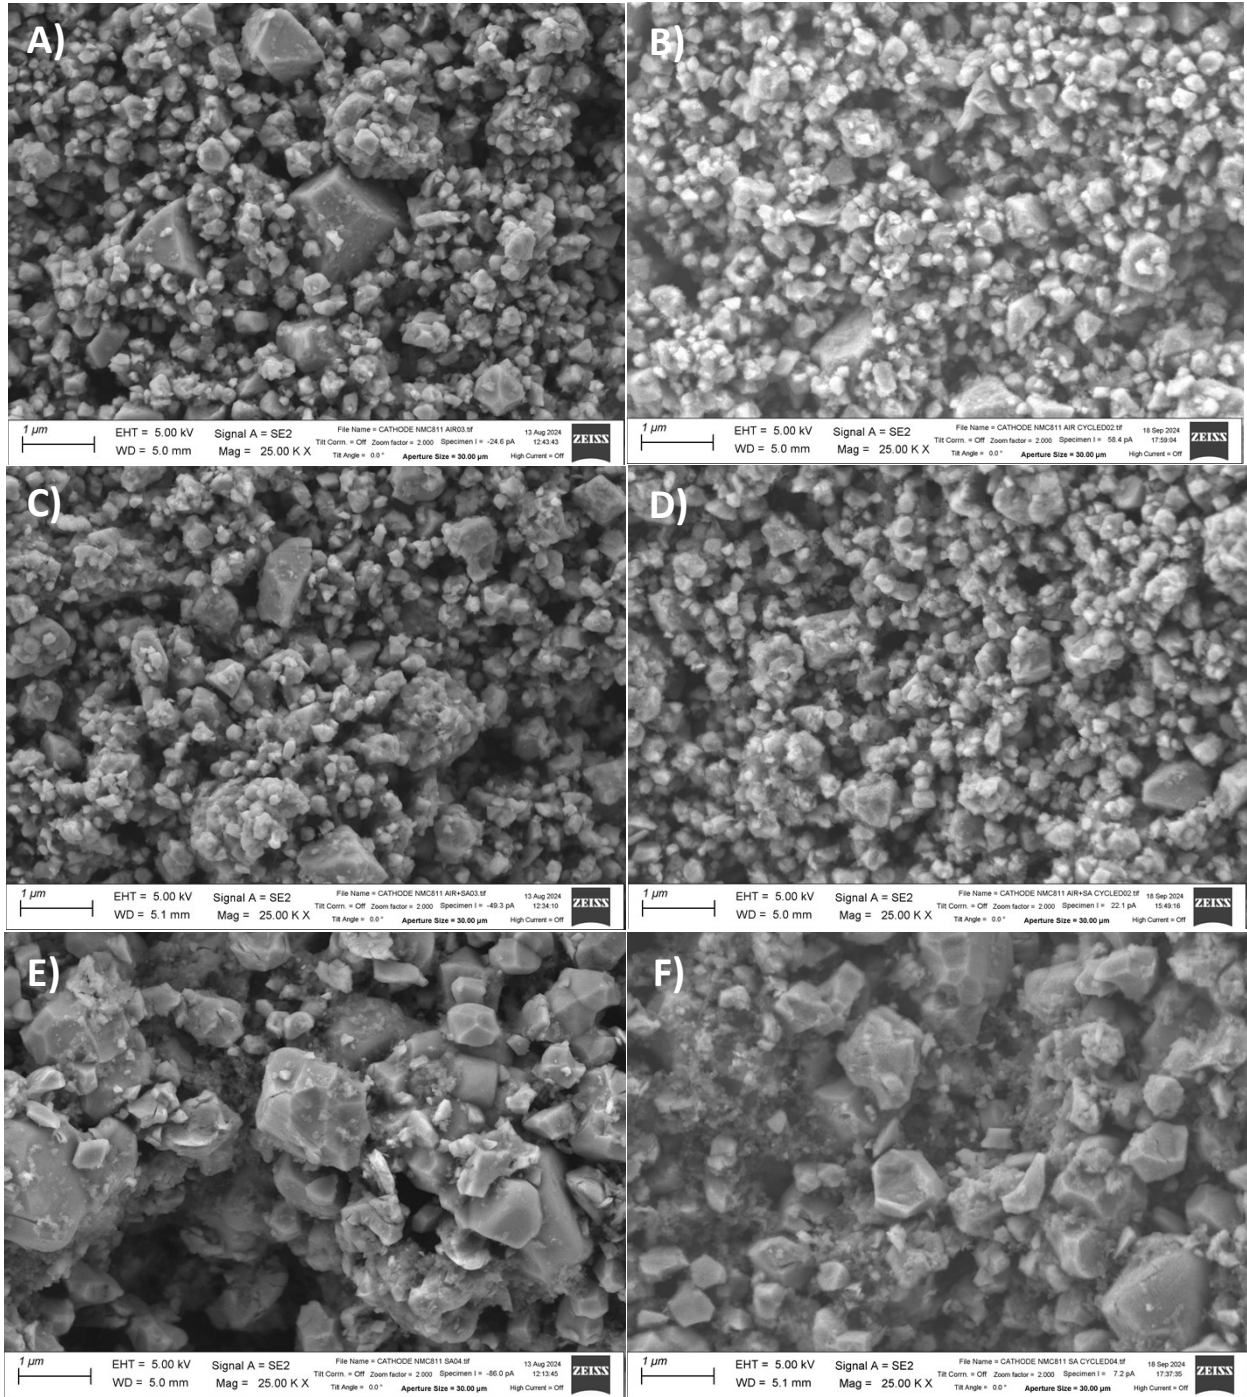

Figure S4. SEM micrographs at 25,000 magnifications of the fresh cathode electrodes and after the C/10 50 cycles program. A-B) NMC811 AIR electrodes, C-D) NMC811 AIR+SA electrodes, and E-F) NMC811 SA electrodes.
